# Supplementary material for: A computational study of phosphorus-doped graphdiynes and several corresponding oxides by simulated X-ray spectroscopy
Source: Royal Society of Chemistry journal article supplement (doi:10.1039/d5cp03339j), 2025-01-01
Supplement: d5cp03339j2.pdf [file d5cp03339j2.pdf]

Reference 18

CCC

Marketplace

This is a License Agreement between Jiayuan Qi/Fuzhou University ("User") and Copyright Clearance Center, Inc. ("CCC") on behalf of the Rightsholder identified in the order details below. The license consists of the order details, the Marketplace Permissions General Terms and Conditions below, and any Rightsholder Terms and Conditions which are included below.

All payments must be made in full to CCC in accordance with the Marketplace Permissions General Terms and Conditions below.

|                  |             |             |                                    |
|------------------|-------------|-------------|------------------------------------|
| Order Date       | 25-Oct-2024 | Type of Use | Republish in a thesis/dissertation |
| Order License ID | 1539582-1   | Publisher   | IOP Publishing                     |
| ISSN             | 2053-1583   | Portion     | Chart/graph/table/figure           |

LICENSED CONTENT

|                   |                                       |                  |                                                      |
|-------------------|---------------------------------------|------------------|------------------------------------------------------|
| Publication Title | 2D materials                          | Country          | United Kingdom of Great Britain and Northern Ireland |
| Author / Editor   | Institute of Physics (Great Britain), | Rightsholder     | IOP Publishing, Ltd                                  |
| Date              | 01/01/2014                            | Publication Type | e-Journal                                            |
| Language          | English                               |                  |                                                      |

REQUEST DETAILS

|                                                        |                                         |                             |                                  |
|--------------------------------------------------------|-----------------------------------------|-----------------------------|----------------------------------|
| Portion Type                                           | Chart/graph/table/figure                | Distribution                | Worldwide                        |
| Number of Charts / Graphs / Tables / Figures Requested | 1                                       | Translation                 | Original language of publication |
| Format (select all that apply)                         | Electronic                              | Copies for the Disabled?    | No                               |
| Who Will Republish the Content?                        | Academic institution                    | Minor Editing Privileges?   | Yes                              |
| Duration of Use                                        | Life of current and all future editions | Incidental Promotional Use? | No                               |
| Lifetime Unit Quantity                                 | More than 2,000,000                     | Currency                    | USD                              |
| Rights Requested                                       | Main product                            |                             |                                  |

NEW WORK DETAILS

|                 |                                                                                                                 |                            |                   |
|-----------------|-----------------------------------------------------------------------------------------------------------------|----------------------------|-------------------|
| Title           | Theoretic Study of Phosphorus-Doped Graphdiynes and Several of Their Corresponding Oxides by X ray Spectroscopy | Institution Name           | Fuzhou University |
| Instructor Name | Jiayuan Qi                                                                                                      | Expected Presentation Date | 2024-11-20        |

ADDITIONAL DETAILS

|                        |     |                                                               |                              |
|------------------------|-----|---------------------------------------------------------------|------------------------------|
| Order Reference Number | N/A | The Requesting Person / Organization to Appear on the License | Jiayuan Qi/Fuzhou University |
|------------------------|-----|---------------------------------------------------------------|------------------------------|

REQUESTED CONTENT DETAILS

|                                                           |                                                                                                                                                        |                                                    |                                                                                                                                                        |
|-----------------------------------------------------------|--------------------------------------------------------------------------------------------------------------------------------------------------------|----------------------------------------------------|--------------------------------------------------------------------------------------------------------------------------------------------------------|
| Title, Description or Numeric Reference of the Portion(s) | Fig.2                                                                                                                                                  | Title of the Article / Chapter the Portion Is From | Preparation and structure study of phosphorus-doped porous graphdiyne and its efficient lithium storage application                                    |
| Editor of Portion(s)                                      | Xiangyan Shen, Xiaodong Li, Fuhua Zhao, Ning Wang, Chipeng Xie, Jianjiang He, Wenyan Si, Yuanping Yi, Ze Yang, Xiaofang Li, Fushen Lu, Changshui Huang | Author of Portion(s)                               | Xiangyan Shen, Xiaodong Li, Fuhua Zhao, Ning Wang, Chipeng Xie, Jianjiang He, Wenyan Si, Yuanping Yi, Ze Yang, Xiaofang Li, Fushen Lu, Changshui Huang |
| Volume / Edition                                          | Volume 6, Number 3                                                                                                                                     | Issue, if Republishing an Article From a Serial    | N/A                                                                                                                                                    |
| Page or Page Range of Portion                             | 035020                                                                                                                                                 | Publication Date of Portion                        | 2019-05-13                                                                                                                                             |

RIGHTSHOLDER TERMS AND CONDITIONS

Reference 21

Nanoscale

Article: Phosphorus modified two-dimensional graphdiyne (CnH2n-2)/ZnCdS form S-scheme heterojunction for photocatalytic hydrogen production

GENERAL INFORMATION

Request ID600185615Request Date25 Oct 2024

Request StatusAcceptedPrice0.00 USD

ALL DETAILS

ISSN:2040-3372Publisher:RSC Pub

Type of Use:Republish in a thesis/dissertationPortion:Chart/graph/table/figure

LICENSED CONTENT

Publication TitleNanoscaleRightsholderRoyal Society of Chemistry

Article TitlePhosphorus modified two-dimensional...Publication Typee-Journal

Author / EditorRoyal Society of Chemistry (Great Brita...URLhttp://www.rsc.org/Publishing/Journals...

Date01/01/2009Start Page12077

LanguageEnglishIssue33

CountryUnited Kingdom of Great Britain and N...Volume14

REQUEST DETAILS

Number of Charts / Graphs / Tables / Figures Requested1DistributionWorldwide

Format (select all that apply)ElectronicTranslationOriginal language of publication

Who Will Republish the Content?Academic InstitutionCopies for the Disabled?No

Duration of UseLife of current editionMinor Editing Privileges?Yes

Lifetime Unit QuantityMore than 2,000,000Incidental Promotional Use?No

Rights RequestedMain productCurrencyUSD

NEW WORK DETAILS

TitleTheoretic Study of Phosphorus-Doped ...Institution NameFuzhou University

Instructor NameJiayuan QiExpected Presentation Date2024-11-20

ADDITIONAL DETAILS

The Requesting Person / Organization to Appear on the LicenseJiayuan Qi/Fuzhou University

REQUESTED CONTENT DETAILS

Title, Description or Numeric Reference of the Portion(s)Fig.3Title of the Article / Chapter the Portion Is FromPhosphorus modified two-dimensional...

Editor of Portion(s)Liu, Yanan; Ma, Xiaohua; Jiang, Xudong...Author of Portion(s)Liu, Yanan; Ma, Xiaohua; Jiang, Xudong...

Volume / Edition14Issue, if Republishing an Article From a Serial33

Page or Page Range of Portion12077-12089Publication Date of Portion2022-08-25



YW ?



Most Trusted. Most Cited. Most Read.

**Machine Learning Assisted Graphdiyne-Based Nanozyme Discovery**

**Author:** Yixin Yu, Yujie Jiang, Chaohui Zhang, et al

**Publication:** ACS Materials Letters

**Publisher:** American Chemical Society

**Date:** Nov 1, 2022

Copyright © 2022, American Chemical Society

**PERMISSION/LICENSE IS GRANTED FOR YOUR ORDER AT NO CHARGE**

This type of permission/license, instead of the standard Terms and Conditions, is sent to you because no fee is being charged for your order. Please note the following:

- Permission is granted for your request in both print and electronic formats, and translations.
- If figures and/or tables were requested, they may be adapted or used in part.
- Please print this page for your records and send a copy of it to your publisher/graduate school.
- Appropriate credit for the requested material should be given as follows: "Reprinted (adapted) with permission from (COMPLETE REFERENCE CITATION). Copyright (YEAR) American Chemical Society." Insert appropriate information in place of the capitalized words.
- One-time permission is granted only for the use specified in your RightsLink request. No additional uses are granted (such as derivative works or other editions). For any uses, please submit a new request.

If credit is given to another source for the material you requested from RightsLink, permission must be obtained from that source.

[BACK](#)[CLOSE WINDOW](#)
