# Supplementary material for: A computational study of phosphorus-doped graphdiynes and several corresponding oxides by simulated X-ray spectroscopy
Source: Royal Society of Chemistry journal article supplement (doi:10.1039/d5cp03339j), 2025-01-01
Supplement: d5cp03339j3.pdf [file d5cp03339j3.pdf]

## Supporting Information

### Computational Study of Phosphorus-Doped Graphdiynes and Several Corresponding Oxides by Simulated X-ray Spectroscopy

Jiayuan Qi\*, Yuling Wang, Tao Gao, Ting Wang

*College of Chemistry, Fuzhou University, Fuzhou, Fujian, 350116, People's Republic of China*

#### Table of Contents

|                                                                                                                                      |    |
|--------------------------------------------------------------------------------------------------------------------------------------|----|
| Energy of single P-doped configurations (A-C) in the $3\times3\times1$ supercell.....                                                | S2 |
| The eight probable configurations for P-doped graphdiyne molecules in the $1\times1\times1$ supercell .....                          | S3 |
| The bond lengths (in Å) for the 7 P-doped graphdiyne molecules of the $3\times3\times1$ supercell surrounding the P-doped core.....  | S4 |
| Theoretically simulated C 1s ionization energy of different bonding types in pure graphdiyne and 7 P-doped graphdiyne molecules..... | S5 |

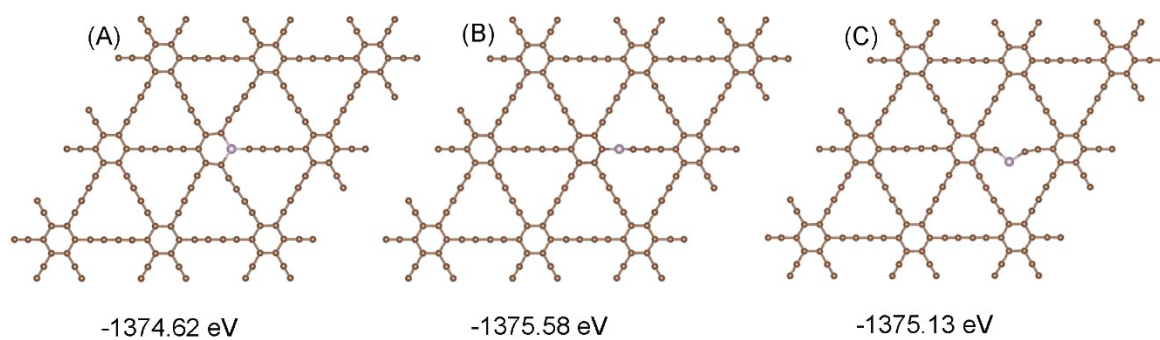

Fig. S1. Energy of single P-doped graphdiyne configurations (A-C) in the  $3\times3\times1$  supercell.

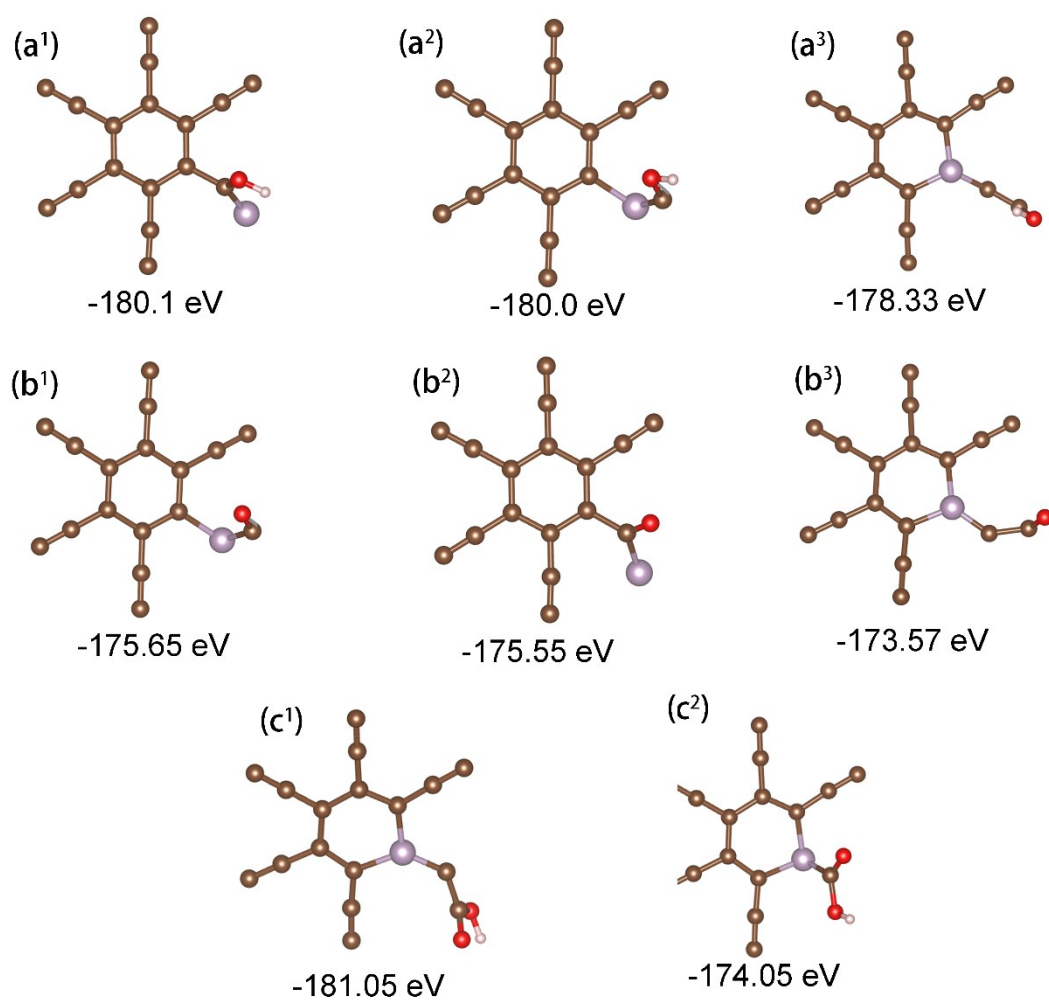

Fig. S2. The eight probable configurations for P-doped graphdiyne molecules in the  $1\times1\times1$  supercell

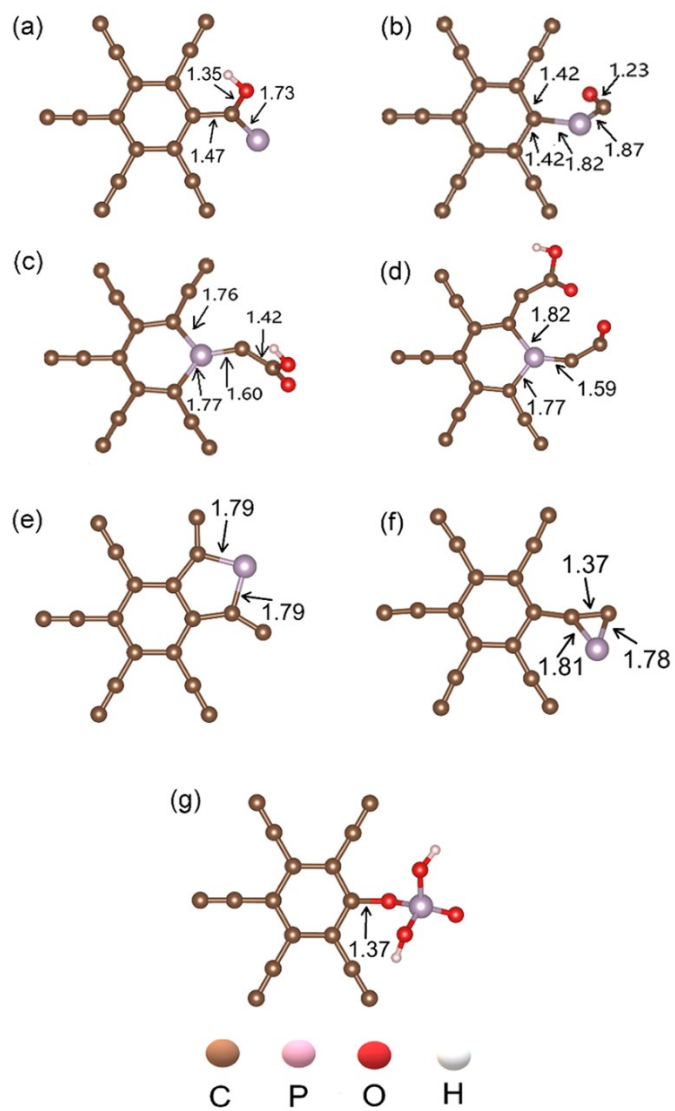

Fig. S3. The bond lengths (in Å) for the 7 P-doped graphdiyne molecules of the  $3\times3\times1$  supercell surrounding the P-doped core.

Table S1 Theoretically simulated C 1s ionization energy of different bonding types in pure graphdiyne and 7 P-doped graphdiyne molecules.

| structures              | C 1s edge             |         |         |       |       |
|-------------------------|-----------------------|---------|---------|-------|-------|
|                         | C-C(sp <sup>2</sup> ) | C-C(sp) | C-P(sp) | C-O   | C=O   |
| pure                    | 284.8                 | 284.0   |         |       |       |
| P-GDY                   | a                     | 285.0   | 284.3   | 286.3 |       |
|                         | b                     | 285.3   | 284.5   | 284.7 | 286.3 |
|                         | c                     | 285.7   | 284.5   | 285.4 | 287.6 |
|                         | d                     | 285.9   | 284.7   | 285.0 | 286.3 |
|                         | e                     | 285.0   | 284.1   | 284.8 |       |
|                         | f                     | 285.0   | 284.3   | 284.5 |       |
|                         | g                     | 285.7   | 284.9   | 286.6 |       |
| Fitted <sup>(a-g)</sup> | 285.3                 | 284.5   | 286.4   | 285.0 | 287.7 |
